# Supplementary material
Source: publisher figshare collection journal article supplement (https://acs.figshare.com/ndownloader/files/4120636)
Supplement: Supplementary file 1 [file 4120636]

# Visible-light responsive photocatalytic fuel cell based on $\text{WO}_3/\text{W}$ photoanode and $\text{Cu}_2\text{O}/\text{Cu}$ photocathode for simultaneous wastewater treatment and electricity generation

*Quanpeng Chen,<sup>†</sup> Jinhua Li,<sup>†</sup> Xuejin Li,<sup>†</sup> Ke Huang,<sup>†</sup> Baoxue Zhou,<sup>\*,†,‡</sup> Weimin Cai,<sup>†</sup>*

*Wenfeng Shangguan<sup>†</sup>*

<sup>†</sup> School of Environmental Science and Engineering Shanghai Jiao Tong University

No. 800 Dongchuan Rd, Shanghai 200240, China

<sup>‡</sup>Key Laboratory of Thin Film and Microfabrication Technology, Ministry of

Education, Shanghai 200240, China

E-mail: zhoubaoxue@sjtu.edu.cn

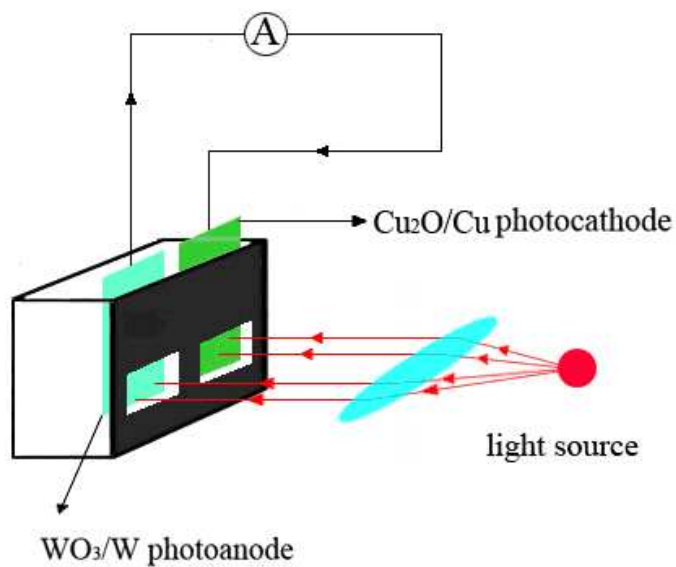

Figure S1. The schematic diagram of self-bias photoelectrochemical cell comprising of  $\text{WO}_3/\text{W}$  photoanode and  $\text{Cu}_2\text{O}/\text{Cu}$  photocathode.

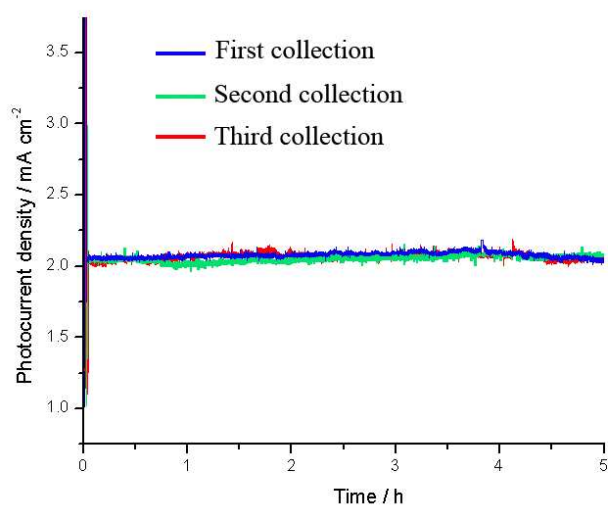

Figure S2. I-t curves of three replications of the PFC system collected in 0.1 M  $\text{KH}_2\text{PO}_4$  solution (pH 7) containing 20  $\text{mg L}^{-1}$  phenol under AM1.5 illumination ( $100 \text{ mW cm}^{-2}$ ).

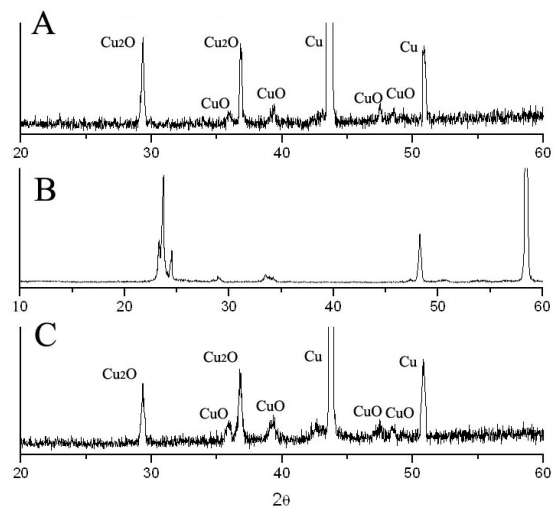

Figure S3. XRD patterns of the freshly prepared  $\text{Cu}_2\text{O}/\text{Cu}$  photocathode (A), the used  $\text{WO}_3/\text{W}$  photoanode (B) and the used  $\text{Cu}_2\text{O}/\text{Cu}$  photocathode (C).
